# Supplementary material for: Direct conversion mechanism from BiOCl nanosheets to BiOF, Bi7F11O5 and BiF3 in the presence of a fluorine resource
Source: Royal Society of Chemistry journal article supplement (doi:10.1039/c6ra11877a), 2016-01-01
Supplement: c6ra11877a1.pdf [file c6ra11877a1.pdf]

**Supporting Information for**

**Direct conversion mechanism from BiOCl nanosheets to BiOF,  
Bi<sub>7</sub>F<sub>11</sub>O<sub>5</sub> and BiF<sub>3</sub> in the presence of fluorine resource**

Yandong Kan, Fei Teng,\* Yang Yang, Juan Xu, Liming Yang

*Jiangsu Engineering and Technology Research Center of Environmental Cleaning  
Materials (ECM), Jiangsu Key Laboratory of Atmospheric Environment Monitoring  
and Pollution Control (AEMPC), Jiangsu Joint Laboratory of Atmospheric Pollution  
Control (APC), Collaborative Innovation Center of Atmospheric Environment and  
Equipment Technology (AEET), School of Environmental Science and Engineering,  
Nanjing University of Information Science & Technology, 219 Ningliu Road,  
Nanjing 210044, China*

---

\* Corresponding author. Tel./Fax.: +86-25-58731090; Email address: tfwd@163.com

**Table S1** The elemental composition of the Bi<sub>7</sub>F<sub>11</sub>O<sub>5</sub>/BiOCl sample from EDS analysis.

| Elements | <i>wt%</i> | <i>at%</i> |
|----------|------------|------------|
| O        | 7.18       | 30.41      |
| F        | 9.85       | 35.14      |
| Cl       | 4.77       | 9.11       |
| Bi       | 78.20      | 25.35      |

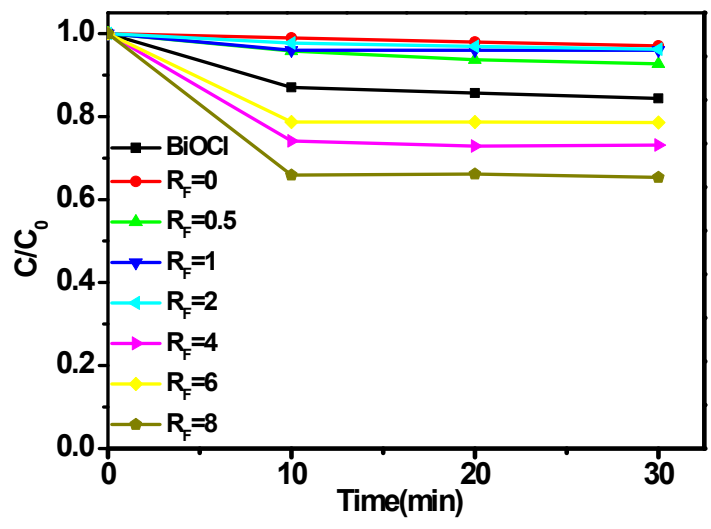

Fig. S1 The adsorption curves of the samples.

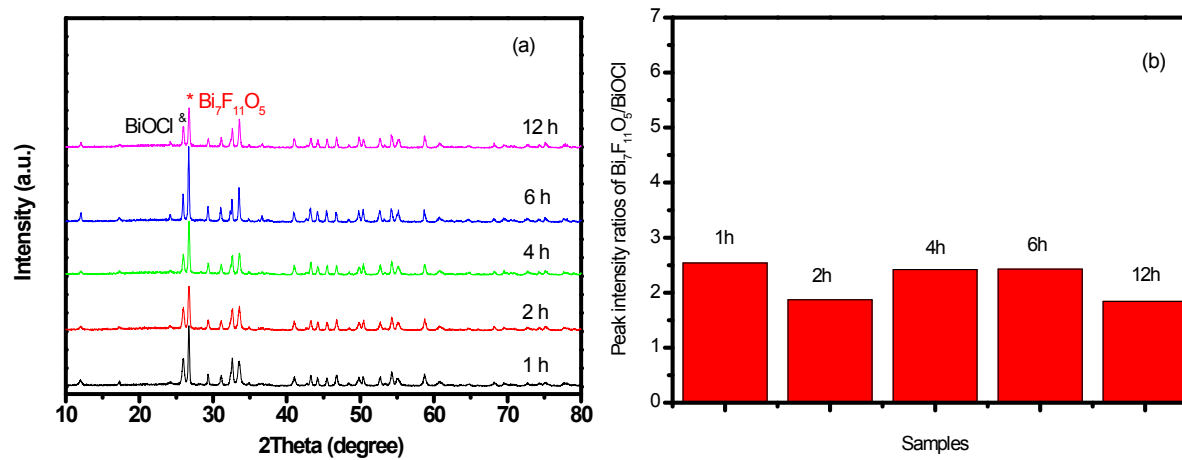

**Fig. S2** (a) XRD patterns of the samples prepared at different reaction time with NH<sub>4</sub>F ( $R_F=2$ ,  $V_{Eth}:V_w=18:2$ ); (b) The intensity ratios of the strongest peaks for Bi<sub>7</sub>F<sub>11</sub>O<sub>5</sub> and BiOCl.

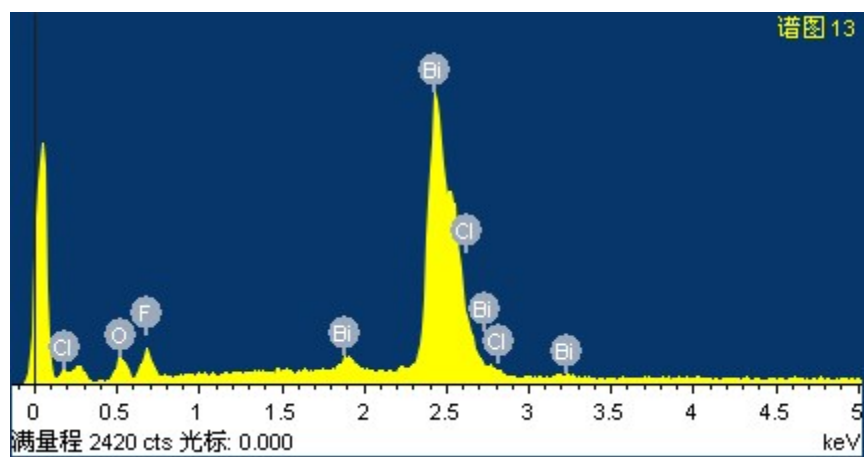

**Fig. S3** The EDS of the  $\text{Bi}_7\text{F}_{11}\text{O}_5/\text{BiOCl}$  sample.

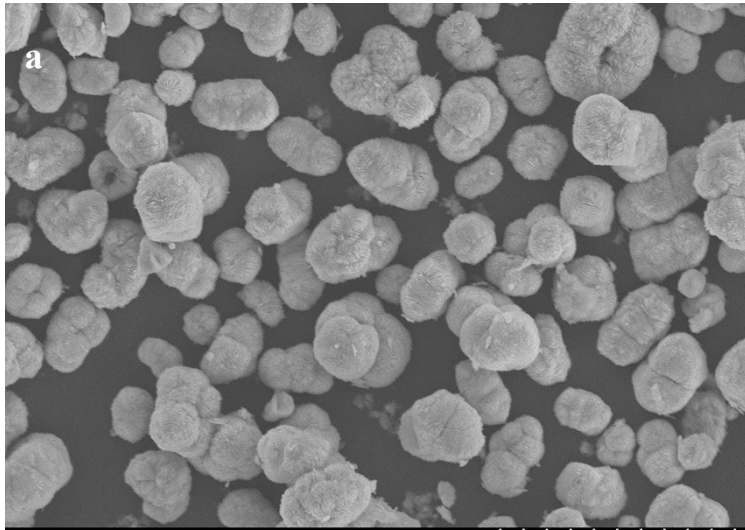

SU1510 15.0kV 9.1mm x2.00k SE 20.0um

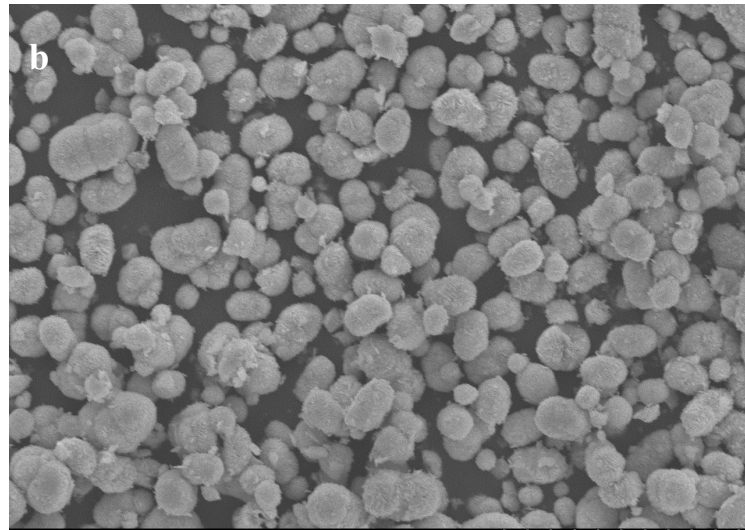

SU1510 15.0kV 15.2mm x2.00k SE 20.0um

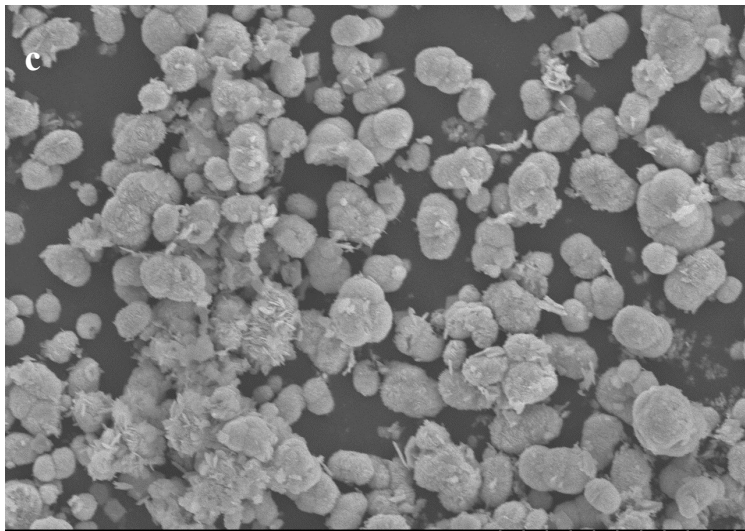

SU1510 15.0kV 15.2mm x2.00k SE 20.0um

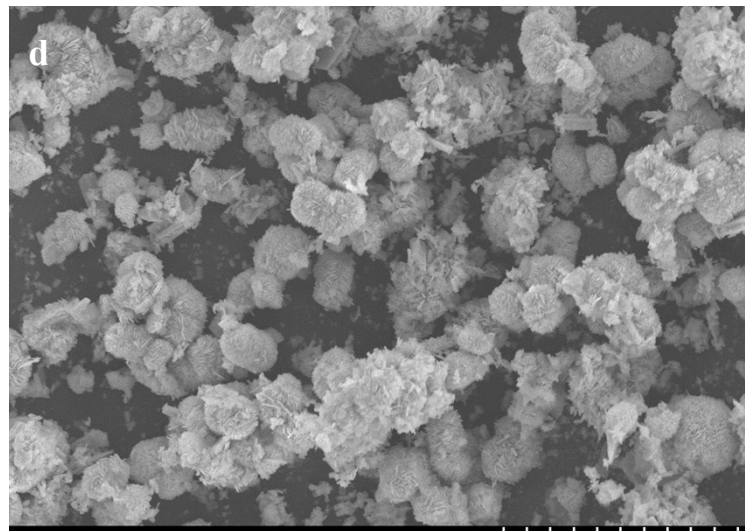

SU1510 15.0kV 9.1mm x2.00k SE 20.0um

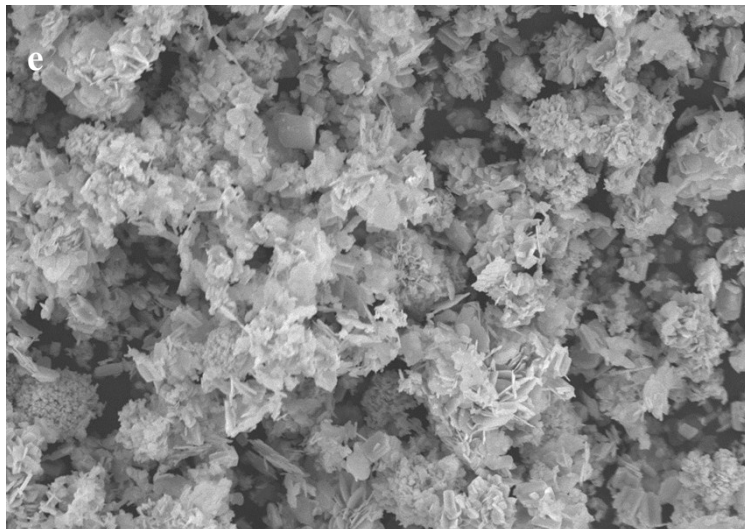

SU1510 15.0kV 8.9mm x2.00k SE 20.0um

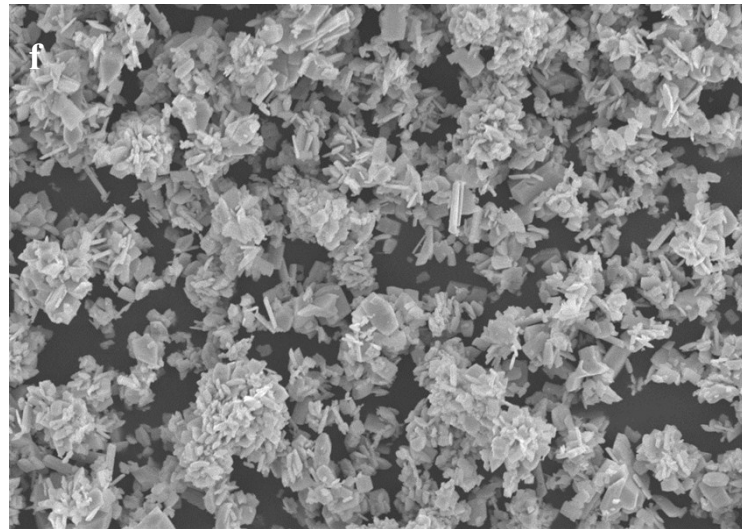

SU1510 15.0kV 8.9mm x2.00k SE 20.0um

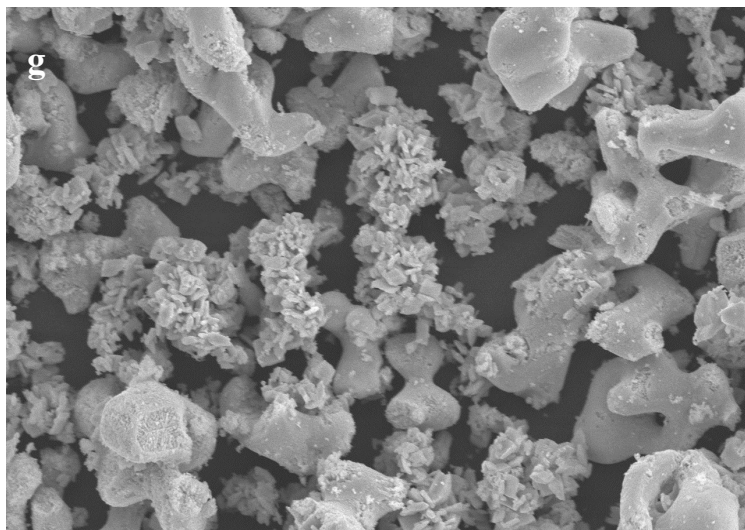

SU1510 15.0kV 9.0mm x2.00k SE 20.0um

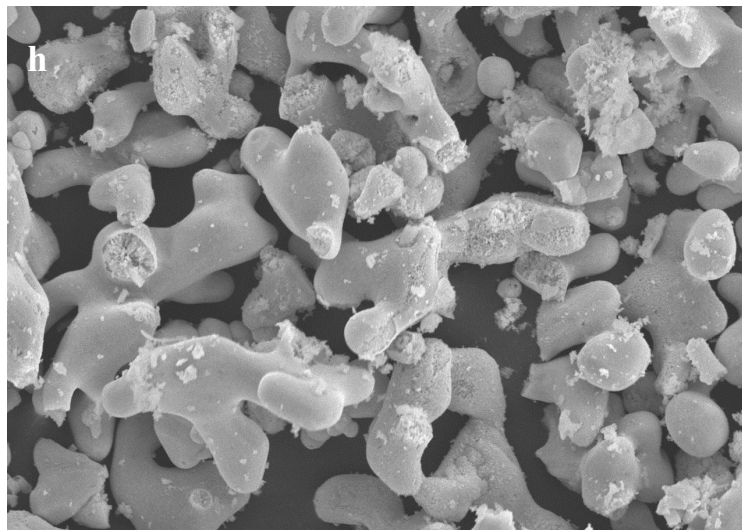

SU1510 15.0kV 9.0mm x2.00k SE 20.0um

**Fig. S4** SEM images of the untreated BiOCl and treated samples by NH<sub>4</sub>F at different molar ratios of F to Bi ( $R_F$ ): (a) untreated BiOCl; (b)  $R_F=0$  (BiOCl); (c)  $R_F=0.5$  (BiOF/BiOCl); (d)  $R_F=1$  (BiOF/Bi<sub>7</sub>F<sub>11</sub>O<sub>5</sub>/BiOCl); (e)  $R_F=2$  (Bi<sub>7</sub>F<sub>11</sub>O<sub>5</sub>/BiOCl); (f)  $R_F=4$  (Bi<sub>7</sub>F<sub>11</sub>O<sub>5</sub>); (g)  $R_F=6$  (Bi<sub>7</sub>F<sub>11</sub>O<sub>5</sub>/BiF<sub>3</sub>); (h)  $R_F=8$  (BiF<sub>3</sub>). Preparation conditions:  $V_{\text{Eth}}/V_{\text{w}}=18/2$  (volumetric ratio of ethanol to water)



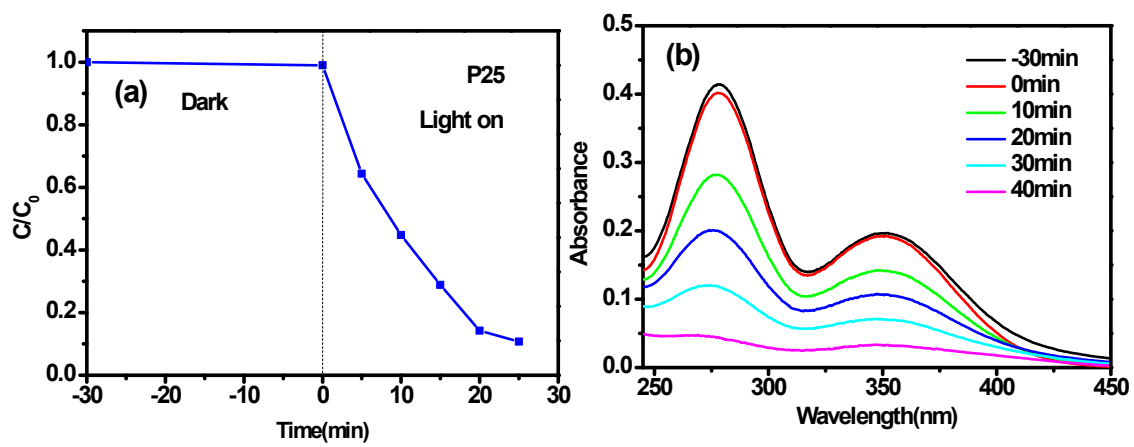

**Fig. S5** (a) Degradation curves of MO over commercial P25; (b) UV-vis absorption spectra of 2-nitrophenol (10 mg/L) over Bi<sub>7</sub>F<sub>11</sub>O<sub>5</sub>/BiOCl sample at different reaction times.

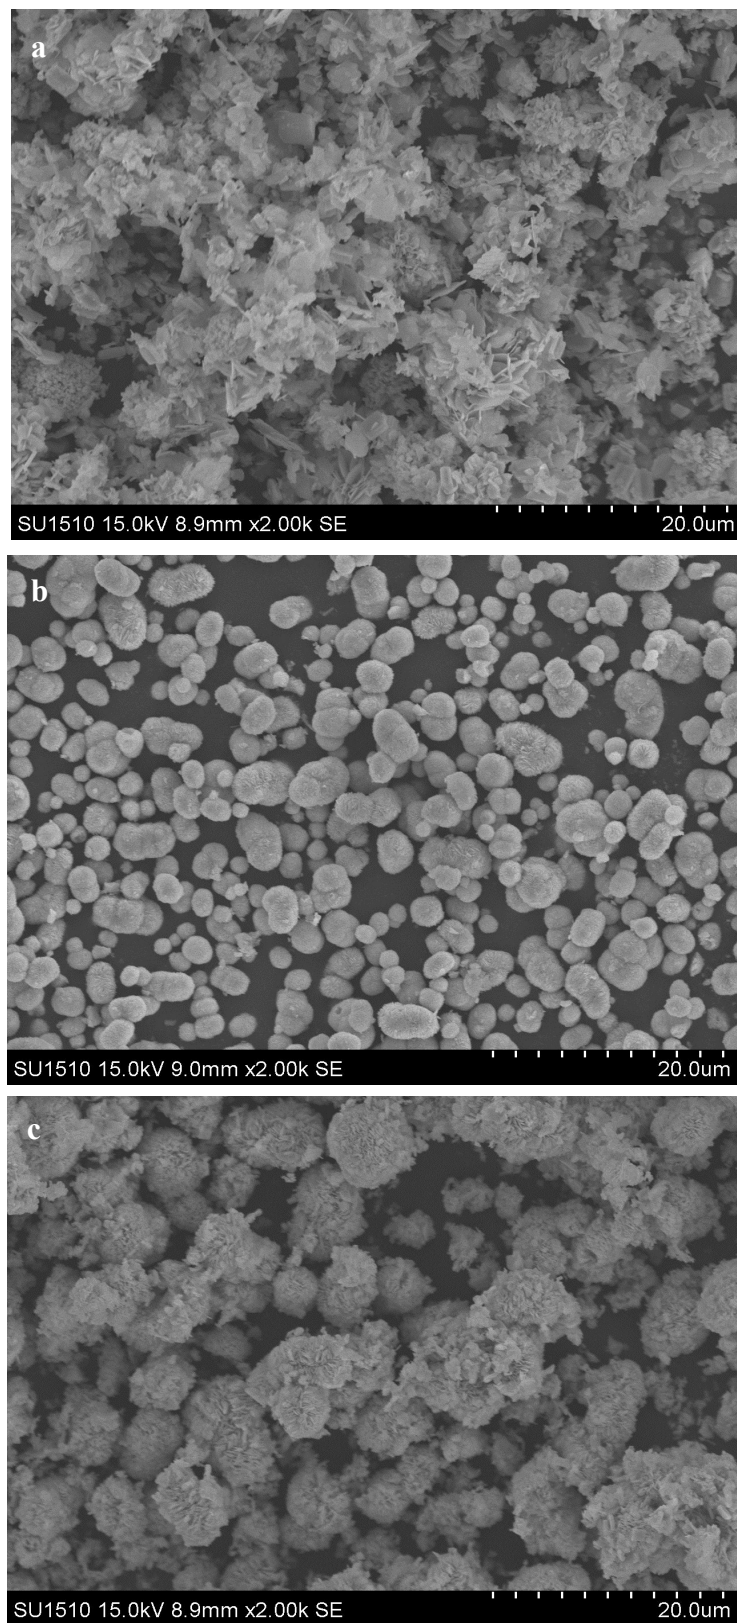

**Fig. S6** SEM images of the samples treated using different fluorine sources: (a)  $\text{NH}_4\text{F}$ ; (b)  $\text{NaF}$ ; (c)  $\text{HF}$ . Preparation conditions:  $R_F = 2$ ;  $V_{\text{Eth}}/V_w = 18/2$ .

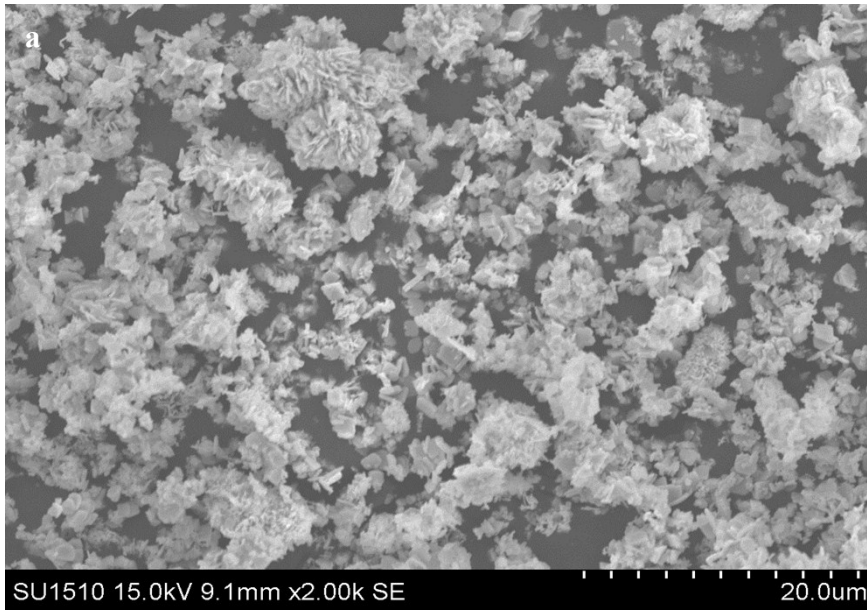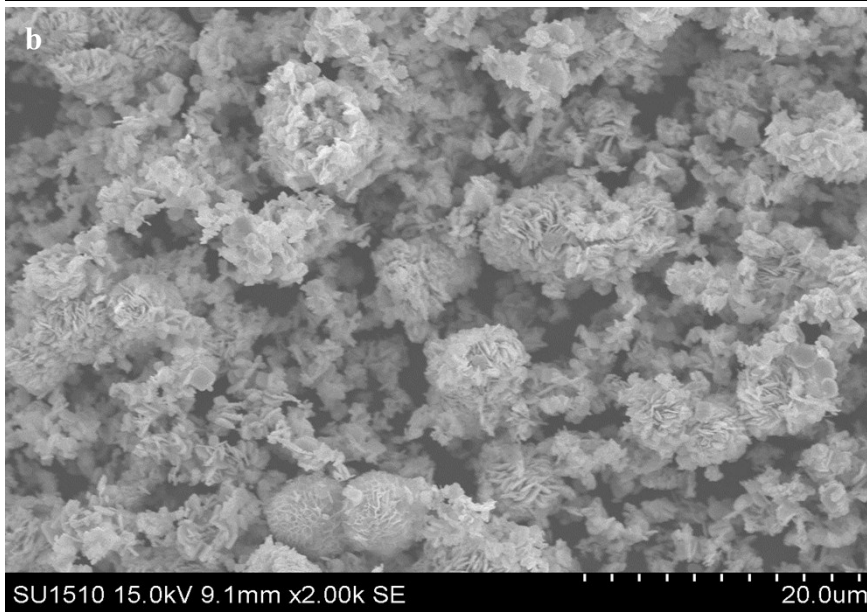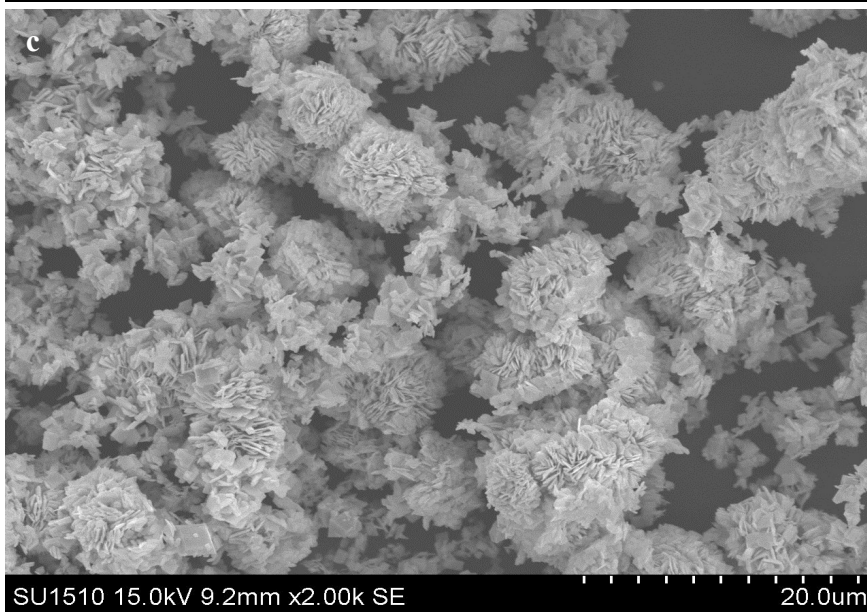

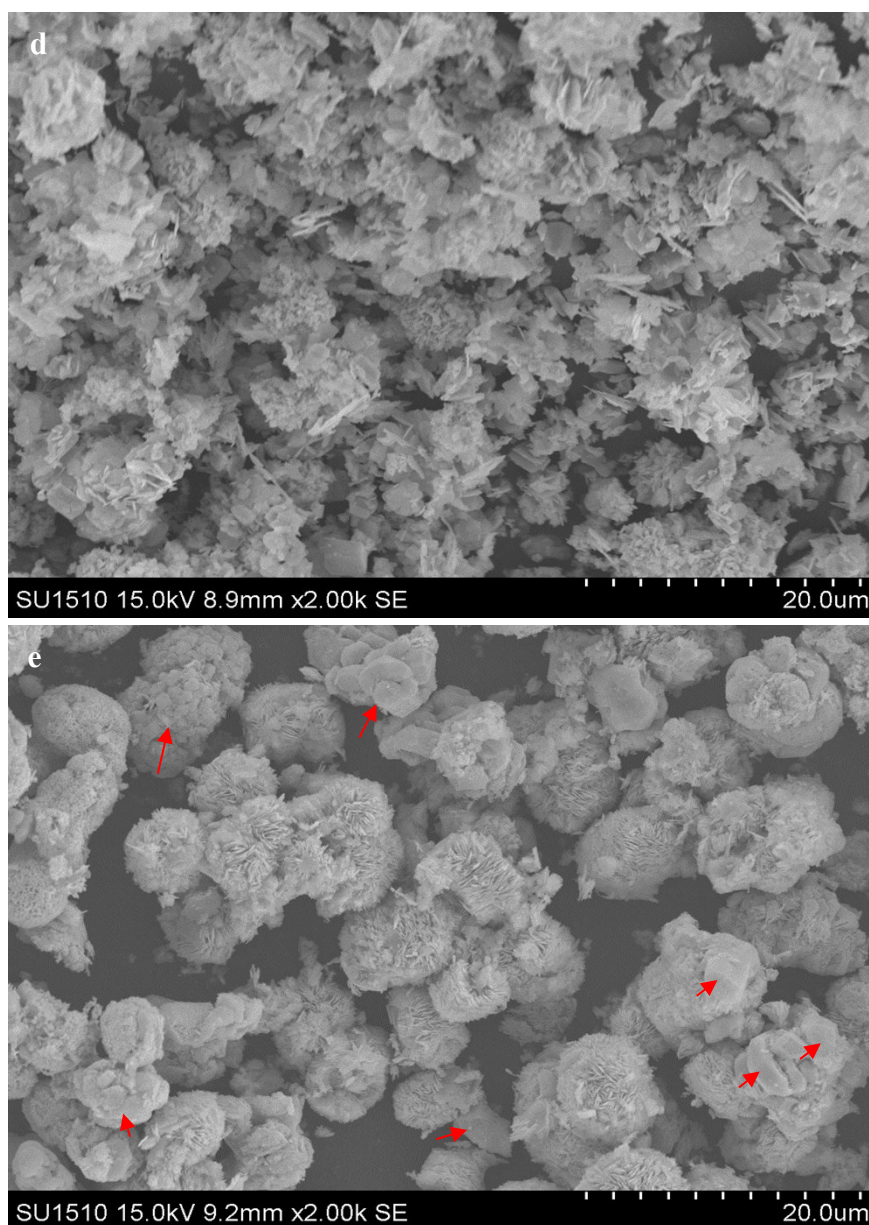

**Fig. S7** SEM images of the samples prepared with  $\text{NH}_4\text{F}$  ( $R_F=2$ ) at different volumetric ratios of ethanol to water ( $V_{\text{Eth}}/V_w$ ): (a) 0/20; (b) 2/18; (c) 10/10; (d) 18/2; (e) 20/0.
